# Supplementary material for: Influence of combined dust reducing carpet and compact air filtration unit on the indoor air quality of a classroom
Source: Royal Society of Chemistry journal article supplement (doi:10.1039/c4em00506f), 2014-10-31
Supplement: c4em00506f1.pdf [file c4em00506f1.pdf]

## Electronic Supplementary Information

### INFLUENCE OF COMBINED DUST REDUCING CARPET AND COMPACT AIR FILTRATION UNIT ON THE INDOOR AIR QUALITY OF A CLASSROOM

Paul T.J. Scheepers<sup>1</sup>, Jeroen J. de Hartog<sup>1</sup>, Judith Reijnaerts<sup>1</sup>, Gwendolyn Beckmann<sup>1</sup>, Rob  
Anzion<sup>1</sup>, Katrien Poels<sup>2</sup>, Lode Godderis<sup>2</sup>

<sup>1</sup>Dept. for Health Evidence, Radboudumc, P.O. Box 9101, 6500 HB Nijmegen, The  
Netherlands

<sup>2</sup>Dept. of Environment and Health, KU Leuven, P.O. Box 7001, 3000 Leuven, Belgium

## INTRODUCTION

The first section ‘General information on conditions during the observation period’ contains  
information such as the dates of the study period, the general meteorological conditions and  
information on changes in the general outdoor air quality during the study period.

The technical specifications of the interventions are provided in Tables S1 and S2. The  
outdoor temperature, humidity and measured air quality parameters are presented in Table S3.

The indoor temperature, humidity and measured air quality parameters over the entire study  
period are provided in Table S4 for classroom A and in Table S5 for classroom B. The  
changes of the IAQ parameters from the baseline to the intervention setting are presented in  
Table S6. An overview of the I/O ratios for all studied conditions is presented in Table S7.  
Figure S1 show some photos of the school building and Figure S2 shows the interior of the  
classroom at the time the interventions were installed. The outdoor concentrations of PM-10  
and PM-2.5 at the school and the PM-10 concentration at a nearby air monitoring station over  
the entire study period are presented in Figure S3.

## **GENERAL INFORMATION ON CONDITIONS DURING THE OBSERVATION**

### **PERIOD**

The measurements started on Monday November 1<sup>st</sup> 2011 and were finalized on Friday December 2<sup>nd</sup> 2011. The outdoor temperature (Table S3) was exceptionally high for November in the Netherlands with an average air temperature ranging from 9.6 to 19.4°C. It was the third sunniest month since 1908 with 95 sun hours compared to an average of 63 and there was only 9 ml of precipitation compared to 82 on average since 1906. The average relative humidity ranged from 55.5 to 68.0%. The wind direction was atypical showing more South to East wind direction than usual, resulting in more stable or stagnant atmospheric conditions than usual and on some days fog occurred (KNMI, 2012). The indoor air temperature was approximately 18°C during the weekend and around 22°C during teaching hours and comparable in the two classrooms (see Table S4 for classroom A and Table S5 for classroom B). Only during the first weekend the average temperature in classroom A was somewhat higher than in classroom B (19.3°C vs. 18.3°C). The average relative humidity varied between 35 and 60% and was similar in both classrooms (Tables S4 and S5). During the weekend the concentration of CO<sub>2</sub> was 400-500 ppm, corresponding to outdoor values. During the lessons the CO<sub>2</sub> concentrations reached hour-average values of 1,500 to 2,100 ppm in both classrooms. The general outdoor air quality was rather poor, due to the stagnant atmospheric conditions. This resulted in a time-weighted average of PM-10 of 42 µg/m<sup>3</sup> and a PM-2.5 value 34 µg/m<sup>3</sup> over the entire study period, based on local measurements at the school location. For PM-2.5 and PM-10 the outdoor concentrations went up to levels above 100 µg/m<sup>3</sup> during episodes of high PM air pollution on November 7-8 and a high peak of PM-10 on November 23 (Figure S3). The pattern of PM-10 at the study location agreed well with the general background PM-10 levels over the study period measured at other air monitoring locations in The Netherlands.

1   **REFERENCE**

- 2       KNMI (2012) *Maandoverzicht van het weer in Nederland. november 2011*. De Bilt,  
3       Koninklijk Nederlands Meteorologisch Insituut.  
4       [http://www.knmi.nl/klimatologie/mow/pdf/mow\\_201111.pdf](http://www.knmi.nl/klimatologie/mow/pdf/mow_201111.pdf)

5

6

1 Table S1: Technical data and product claims for the dust reducing carpet.

|                               |                                                                                                                                                                                                                                                                                                       |
|-------------------------------|-------------------------------------------------------------------------------------------------------------------------------------------------------------------------------------------------------------------------------------------------------------------------------------------------------|
| Manufacturer                  | Desso, Waalwijk, The Netherlands                                                                                                                                                                                                                                                                      |
| Type                          | AirMaster®                                                                                                                                                                                                                                                                                            |
| Description                   | Carpet tiles                                                                                                                                                                                                                                                                                          |
| Dimensions                    | 50 x 50 cm                                                                                                                                                                                                                                                                                            |
| Technical description         | The carpet consists of thin yarns capturing and retaining the fine dust (DESSO Airfilters™) and thicker yarns capturing and retaining the coarser fine dust (DESSO DustCollectors™) For more technical information see: <a href="http://www.desso-airmaster.com/">http://www.desso-airmaster.com/</a> |
| Maintenance                   | Vacuum cleaning in the direction of the pile, at least twice a week, using a vacuum cleaner with a HEPA filter                                                                                                                                                                                        |
| Results of laboratory testing | The concentration of PM-10 was fourfold lower compared to a standard structured loop pile carpet and eightfold lower compared to a hard polyvinyl floor <sup>a</sup>                                                                                                                                  |

2 <sup>a</sup> The authors were given access to the original reports.

3

1 Table S2: Technical data and product claims for the air filtration unit.

|                                 |                                                                                                                                                                                                                                  |
|---------------------------------|----------------------------------------------------------------------------------------------------------------------------------------------------------------------------------------------------------------------------------|
| Manufacturer                    | Philips, Drachten, The Netherlands                                                                                                                                                                                               |
| Type                            | AC4091                                                                                                                                                                                                                           |
| Technology used                 | Filtration and adsorption                                                                                                                                                                                                        |
| Filter type                     | Pre-filter and formaldehyde filter (type AC4187)                                                                                                                                                                                 |
| Effective area                  | up to 70 m <sup>2</sup>                                                                                                                                                                                                          |
| Air filtration capacity         | Setting 1: (AUTO)<br>Setting 2: (SILENT): 150 m <sup>3</sup> /h<br>Setting 3: 180 m <sup>3</sup> /h<br>Setting 4: 270 m <sup>3</sup> /h<br>Setting 5 (TURBO): 390 m <sup>3</sup> /h                                              |
| Clean air delivery rate (CADR)* | 340 m <sup>3</sup> /h                                                                                                                                                                                                            |
| Ozon emission                   | Negligible                                                                                                                                                                                                                       |
| Noise level                     | 37 (SILENT) – 58 dB (TURBO).                                                                                                                                                                                                     |
| Wattage                         | 51 W                                                                                                                                                                                                                             |
| Dimensions (W x D x H)          | 45.5 x 29.5 x 68.5 cm                                                                                                                                                                                                            |
| Weight                          | 12 kg                                                                                                                                                                                                                            |
| Maintenance                     | If the pre-filter is soiled (indicated by the flashing sensor) the filter can be removed and cleaned using tap water followed by air drying. For the use in homes it is recommended to clean the pre-filter once every two weeks |
| Change of filters               | Once every three years for the use in homes                                                                                                                                                                                      |
| Reduction particulate matter    | 98.1 % dust/pollen (0.3 µm) <sup>a</sup>                                                                                                                                                                                         |
| Reduction of VOC                | 98.1 % for total VOC <sup>a</sup><br>97.5 % for benzene <sup>a</sup>                                                                                                                                                             |
| Reduction of formaldehyde       | 99.1 % for formaldehyde when using filter AC4187 <sup>a</sup>                                                                                                                                                                    |
| Reduction of microorganisms     | >99.9 % of for bacteria ( <i>Staphylococcus alba</i> )                                                                                                                                                                           |

2 <sup>a</sup> These results were obtained at the Guandong Detection Centre of Microbiology.

1 Tabel S3: Temperature, relative humidity and other indicators of outdoor air quality.

2

| Indicator                                           | Week 1              | Weekend 2            | Week 2              | Weekend 3         | Week 3        | Weekend 4           | Week 4              | Weekend 5           | Week 5              |
|-----------------------------------------------------|---------------------|----------------------|---------------------|-------------------|---------------|---------------------|---------------------|---------------------|---------------------|
| Temperature (°C)                                    | 19.4<br>(17.1-20.7) | 16.0<br>(14.5-20.6)  | 13.7<br>(13.2-14.4) | -                 | -             | 9.6<br>(8.0-15.4)   | 10.0<br>(9.1-11.6)  | 13.0<br>(11.4-14.1) | 12.1<br>(11.0-12.9) |
| Relative humidity (%)                               | 55.5<br>(51.9-59.5) | 61.81<br>(47.5-65.2) | 62.4<br>(60.0-68.1) | -                 | -             | 67.7<br>(56.3-71.8) | 66.9<br>(63.6-74.2) | 69.0<br>(63.2-70.1) | 61.8<br>(58.9-66.4) |
| CO <sub>2</sub> (ppm)                               | 375<br>(361-401)    | 412<br>(397-417)     | 423<br>(416-438)    | -                 | -             | 470<br>(457-484)    | 476<br>(405-533)    | 382<br>(381-390)    | 409<br>(402-418)    |
| CO <sub>2</sub> (98-percentile)                     | 410                 | 436                  | 467                 | -                 | -             | 536                 | 609                 | 396                 | 449                 |
| PM-2.5 (µg/m <sup>3</sup> )                         | 19<br>(12-21)       | 30<br>(17-70)        | 60<br>(38-93)       | 47<br>(37-51)     | 38<br>(32-48) | 33<br>(31-40)       | 44<br>(39-52)       | 21<br>(19-24)       | 18<br>(11-27)       |
| PM-10 (µg/m <sup>3</sup> )                          | 22<br>(14-27)       | 36<br>(21-65)        | 67<br>(39-105)      | 44<br>(39-53)     | 50<br>(42-58) | 40<br>(33-48)       | 57<br>(45-67)       | 37<br>(31-40)       | 28<br>(25-32)       |
| VOC <sup>b,e</sup> (µg/m <sup>3</sup> )             | <1.0                | <1.0                 | <1.0                | <1.0              | 41.05         | 68.10               | <1.0                | <1.0                | 148.70              |
| Formaldehyde <sup>b,e</sup> (µg/m <sup>3</sup> )    | <1.0                | 1.24                 | <1.0                | 1.23 <sup>d</sup> | <1.0          | <1.0                | <1.0                | <1.0                | 0.74 <sup>d</sup>   |
| NO <sub>2</sub> <sup>b,e</sup> (µg/m <sup>3</sup> ) | 52.3                | 22.4                 | 27.0                | 28.67             | 23.0          | 29.1                | 38.9                | 34.8                | 35.3                |

3

4 <sup>a</sup> Mean concentration of PM based on only one filter (sampling of two intervals of 7 h); <sup>b</sup> Arithmetic mean of observations in duplicate; <sup>c</sup>  
5 Arithmetic mean with 25<sup>th</sup> and 75<sup>th</sup> percentile values; <sup>d</sup> Single observation; <sup>e</sup> Based on one continuous measurement during the entire week; \*  
6 Intervention period; - No data available; < lod = below the limit of determination.

7

1 Table S4: Temperature and relative humidity and indicators of air quality in classroom A (Means and 0.25 and 0.75 percentiles). The columns  
2 containing the data related to interventions (Weekend 2 and week 2).  
3

| Parameter                                            | Week 1                           | Weekend 2*          | Week 2*                  | Weekend 3              | Week 3                  | Weekend 4              | Week 4                   | Weekend 5            | Week 5                  |
|------------------------------------------------------|----------------------------------|---------------------|--------------------------|------------------------|-------------------------|------------------------|--------------------------|----------------------|-------------------------|
| Temperature (°C)                                     | 23.6<br>(22.4-24.4)              | 19.3<br>(18.2-20.5) | 22.8<br>(21.78-23.9)     | 17.7<br>(17.3-17.9)    | 23.4<br>(22.1-24.5)     | 17.8<br>(17.3-18.2)    | 22.70<br>(21.71-23.73)   | 17.9<br>(17.8-18.0)  | 22.8<br>(21.4-23.5)     |
| Relative humidity (%)                                | 53.1<br>(49-56)                  | 51.3<br>(50.2-51.6) | 46.1<br>(42.7-49.4)      | 39.3<br>(37.6-40.9)    | 37.50<br>(32.6-43.9)    | 41.5<br>(38.8-42.9)    | 46.15<br>(41.42-50.01)   | 46.1<br>(44.3-46.9)  | 45.89<br>(43.2-49.7)    |
| CO <sub>2</sub> (ppm)                                | 1509<br>(1166-2108)              | 503<br>(494-528)    | 1811<br>(1157-2226)      | 478<br>(441-551)       | 2066<br>(1700-2674)     | 532<br>(515-571)       | 2115<br>(1679-2534)      | 442<br>(437-454)     | 2068<br>(1256-2605)     |
| CO <sub>2</sub> (98 percentile)                      | 2801                             | 552                 | 2859                     | 565                    | 3108                    | 579                    | 3324                     | 458                  | 3005                    |
| PM-1.0 (spec) (µg m <sup>-3</sup> )                  | 14.03<br>(10.43-19.91)           | 3.01<br>(1.94-5.81) | 17.65<br>(12.60-29.80)   | 25.45<br>(24.00-26.79) | 22.43<br>(17.27-28.15)  | 12.35<br>(11.97-13.19) | 21.36<br>(17.33-31.03)   | 6.68<br>(4.58-8.83)  | 8.92<br>(4.89-13.29)    |
| PM-2.5 (spec) (µg m <sup>-3</sup> )                  | 28.66<br>(19.44-38.56)           | 3.16<br>(2.06-5.97) | 27.07<br>(17.75-40.95)   | 25.84<br>(24.40-27.25) | 34.03<br>(28.20-40.44)  | 12.52<br>(12.10-13.57) | 39.53<br>(28.78-46.43)   | 8.26<br>(6.60-10.06) | 24.73<br>(14.20-31.40)  |
| PM-10 (spec) (µg m <sup>-3</sup> )                   | 131.64<br>(82.67-192.26)         | 3.18<br>(2.06-5.99) | 103.36<br>(56.54-148.21) | 25.98<br>(24.52-27.36) | 110.95<br>(67.87-153.7) | 12.56<br>(12.13-13.61) | 148.67<br>(91.55-203.70) | 8.61<br>(7.01-10.37) | 133.29<br>(78.03-178.3) |
| PM-2.5 (grav) <sup>b</sup> (µg m <sup>-3</sup> )     | 28.5<br>(19.8-37.1)              | n.d. <sup>a*</sup>  | 24.3<br>(20.0-31.9)      | 19.1 <sup>a</sup>      | 27.8<br>(26.0-30.6)     | 11.6 <sup>a</sup>      | 35.9<br>(25.0-42.8)      | 6.7 <sup>a</sup>     | 24.0<br>(22.3-25.4)     |
| PM-10 (grav) <sup>b</sup> (µg m <sup>-3</sup> )      | 70.9<br>(66.6-75.3) <sup>c</sup> | 3.3 <sup>a</sup>    | 83.4<br>(72.8-84.7)      | 17.5 <sup>a</sup>      | 88.4<br>(82.6-86.7)     | 9.5 <sup>a</sup>       | 126.3<br>(114.7-126.2)   | 9.8 <sup>a</sup>     | 124.4<br>(108.0-136.1)  |
| BS (PM-10) (10 <sup>-5</sup> m <sup>-1</sup> )       | 2.0<br>(1.9-2.1) <sup>c</sup>    | 0.5 <sup>a</sup>    | 2.2<br>(2.2-2.8)         | 2.7 <sup>a</sup>       | 3.2<br>(2.9-3.5)        | 2.5 <sup>a</sup>       | 4.9<br>(2.4-6.5)         | 0.5 <sup>a</sup>     | 1.9<br>(1.5-2.1)        |
| BS (PM-2.5) (10 <sup>-5</sup> m <sup>-1</sup> )      | 1.7<br>(1.4-2.1)                 | 0.4 <sup>a</sup>    | 2.0<br>(2.0-2.3)         | 2.4 <sup>a</sup>       | 2.9<br>(2.9-3.2)        | 2.8 <sup>a</sup>       | 4.8<br>(2.0-6.4)         | 1.0 <sup>a</sup>     | 1.6<br>(1.3-1.5)        |
| VOS <sup>b,e</sup> (µg m <sup>-3</sup> )             | 63.55                            | <1.0                | 52.45                    | <1.0                   | 89.20                   | <1.0                   | 183.85                   | <1.0                 | 106.30                  |
| Formaldehyde <sup>b,e</sup> (µg m <sup>-3</sup> )    | 23.1                             | 17.17               | 22.48                    | 15.7                   | 20.23                   | 14.83                  | 25.65                    | 12.89                | 22.01                   |
| NO <sub>2</sub> <sup>b,e</sup> (µg m <sup>-3</sup> ) | 61.0                             | -                   | 6.1                      | 12.4                   | 13.4                    | 9.1                    | 19.0                     | 11.2                 | 27.8                    |

4 <sup>a</sup> Mean concentration of PM based on only one filter (sampling of two intervals of 7 h); <sup>b</sup> Arithmetic mean of observations in duplicate; <sup>c</sup> Arithmetic mean with 25<sup>th</sup> and 75<sup>th</sup> percentile values; <sup>d</sup>  
5 Single observation; <sup>e</sup> Based on one continuous measurement during the entire week; \* Intervention period; - No data available; < lod = below the limit of determination.  
6  
7

1 Table S5: Temperature and relative humidity and indicators of air quality in classroom B (Means and 0.25 en 0.75 percentiles). The columns  
2 containing the data related to interventions (Weekend 4 and week 4).  
3

| Parameter                                            | Week 1                              | Weekend 2              | Week 2                   | Weekend 3              | Week 3                   | Weekend 4*          | Week 4*                 | Weekend 5           | Week 5                   |
|------------------------------------------------------|-------------------------------------|------------------------|--------------------------|------------------------|--------------------------|---------------------|-------------------------|---------------------|--------------------------|
| Temperature (°C)                                     | 23.4<br>(22.5-23.9)                 | 18.3<br>(17.0-19.4)    | 22.4<br>(21.6-23.1)      | 17.1<br>(16.9-17.5)    | 22.1<br>(21.3-22.7)      | 17.1<br>(16.5-17.4) | 21.7<br>(21.0-22.6)     | 17.8<br>(17.6-17.9) | 22.3<br>(20.8-23.0)      |
| Relative humidity (%)                                | 52.8<br>(51.5-56.8)                 | 54.6<br>(53.4-56.6)    | 47.5<br>(44.7-51.4)      | 41.8<br>(40.9-42.5)    | 40.8<br>(36.0-46.2)      | 43.6<br>(41.1-45.3) | 46.5<br>(43.3-48.0)     | 46.8<br>(45.6-48.5) | 45.4<br>(43.0-48.9)      |
| CO <sub>2</sub> (ppm)                                | 1472<br>(1035-1857)                 | 435<br>(425-464)       | 1765<br>(1093-2087)      | 457<br>(445-506)       | 2044<br>(1522-2271)      | 507<br>(487-552)    | 1747<br>(1155-2500)     | 410<br>(403-424)    | 1639<br>(1095-2387)      |
| CO <sub>2</sub> (98th percentile)                    | 2509                                | 489                    | 2709                     | 509                    | 2724                     | 561                 | 3177                    | 426                 | 3116                     |
| PM-1.0 (spec) (µg m <sup>-3</sup> )                  | 13.89<br>(11.94-20.48)              | 14.87<br>(9.50-26.84)  | 30.89<br>(20.76-52.31)   | 25.09<br>(23.25-26.16) | 22.13<br>(18.12-28.34)   | 4.88<br>(4.56-5.39) | 13.62<br>(8.83-16.02)   | 6.12<br>(4.18-8.37) | 8.50<br>(4.90-13.05)     |
| PM-2.5 (spec) (µg m <sup>-3</sup> )                  | 31.77<br>(21.05-43.10)              | 15.45<br>(10.06-27.61) | 46.65<br>(30.13-67.38)   | 25.48<br>(23.77-26.48) | 30.93<br>(26.32-41.45)   | 4.95<br>(4.70-5.45) | 22.61<br>(12.99-28.19)  | 7.39<br>(5.51-9.40) | 20.94<br>(13.00-31.19)   |
| PM-10 (spec) (µg m <sup>-3</sup> )                   | 179.89<br>(113.5-259.9)             | 15.71<br>(10.27-27.88) | 149.53<br>(83.51-189.81) | 25.55<br>(23.90-26.51) | 106.78<br>(78.26-141.00) | 4.96<br>(4.72-5.45) | 96.63<br>(40.58-144.89) | 7.75<br>(5.75-9.63) | 114.47<br>(50.75-193.60) |
| PM-2.5 (grav) <sup>b</sup> (µg m <sup>-3</sup> )     | 29.5<br>(21.8-37.3)                 | <3.0                   | 38.9<br>(29.5-54.0)      | 19.2 <sup>a</sup>      | 26.4<br>(25.4-28.8)      | <3.0 <sup>a</sup>   | 20.3<br>(15.3-21.6)     | n.d <sup>a</sup>    | 22.3<br>(21.1-24.6)      |
| PM-10 (grav) <sup>b</sup> (µg m <sup>-3</sup> )      | 114.7<br>(112.5-116.9) <sup>c</sup> | <3.0                   | 124.8<br>(126.3-136.5)   | 19.8 <sup>a</sup>      | 113.3<br>(100.9-121.4)   | <3.0 <sup>a</sup>   | 99.3<br>(85.3-122.6)    | n.d <sup>a</sup>    | 121.8<br>(123.9-137.9)   |
| BS (PM-10) (10 <sup>-5</sup> m <sup>-1</sup> )       | 2.3<br>(2.0-2.6) <sup>c</sup>       | <0.5 <sup>a</sup>      | 3.2<br>(3.2-4.2)         | 2.6 <sup>a</sup>       | 3.4<br>(3.2-3.6)         | 1.1 <sup>a</sup>    | 2.9<br>(1.9-3.3)        | 0.6 <sup>a</sup>    | 2.2<br>(1.8-2.2)         |
| BS (PM-2.5) (10 <sup>-5</sup> m <sup>-1</sup> )      | 1.4<br>(1.0-2.0)                    | <0.5 <sup>a</sup>      | 3.0<br>(2.9-3.3)         | 2.7 <sup>a</sup>       | 2.8<br>(2.7-3.2)         | 1.0 <sup>a</sup>    | 2.3<br>(1.2-2.2)        | 0.7 <sup>a</sup>    | 1.4<br>(1.0-1.3)         |
| VOC <sup>b,e</sup> (µg m <sup>-3</sup> )             | 67.00                               | 12.00                  | 32.60                    | < lod                  | 148.30                   | 5.70                | 169.90                  | 5.70                | 197.90                   |
| Formaldehyde <sup>b,e</sup> (µg m <sup>-3</sup> )    | 44.35                               | 22.13                  | 23.76                    | 16.91                  | 18.28                    | 14.56               | 24.34                   | 27.89               | 27.43                    |
| NO <sub>2</sub> <sup>b,e</sup> (µg m <sup>-3</sup> ) | -                                   | 10.4                   | 3.48                     | 11.3                   | 9.36                     | 12.51               | -                       | 6.84                | 18.53                    |

4 <sup>a</sup> Mean concentration of PM based on only one filter (sampling of two intervals of 7 h); <sup>b</sup> Arithmetic mean of observations in duplicate; <sup>c</sup> Arithmetic mean with 25<sup>th</sup> and 75<sup>th</sup> percentile values; <sup>d</sup>  
5 Single observation; <sup>e</sup> Concentrations five to tenfold lower than the actual outdoor levels at that time point; \* Intervention period; - No data available; < lod = below the limit of determination.  
6

7

8



1 Table S6: Relative change for non-intervention and intervention weekends and weeks.

| IAQ parameters   | Weekend             |                              |                  |                              |         | Week                |                              |                  |                    |         |
|------------------|---------------------|------------------------------|------------------|------------------------------|---------|---------------------|------------------------------|------------------|--------------------|---------|
|                  | No intervention (%) |                              | Intervention (%) |                              | p-value | No intervention (%) |                              | Intervention (%) |                    | p-value |
|                  | N                   | AM $\pm$ SD                  | N                | AM $\pm$ SD                  |         | N                   | AM $\pm$ SD                  | N                | AM $\pm$ SD        |         |
| PM-1.0 (spec)    | 2                   | -4.9 $\pm$ 3.5               | 2                | -70.1 $\pm$ 9.6              | 0.059   | 3                   | -2.35 $\pm$ 1.67             | 2                | -40.0 $\pm$ 2.9    | 0.001   |
| PM-2.5 (spec)    | 2                   | -6.0 $\pm$ 4.6               | 2                | -70.0 $\pm$ 9.5              | 0.066   | 3                   | -11.4 $\pm$ 2.78             | 2                | -41.8 $\pm$ 1.1    | 0.002   |
| PM-10 (spec)     | 2                   | -5.8 $\pm$ 4.2               | 2                | -70.1 $\pm$ 9.6              | 0.064   | 3                   | -14.9 $\pm$ 9.43             | 2                | -32.9 $\pm$ 2.1    | 0.144   |
| PM-2.5 (grav)    | 1                   | 0.52 <sup>a b</sup>          | 1                | -87.1 <sup>a</sup>           | -       | 3                   | -2.81 $\pm$ 2.10             | 2                | -40.5 $\pm$ 3.0    | 0.001   |
| PM-10 (grav)     | 2                   | 11.6 <sup>b</sup>            | 2                | -84.5 $\pm$ 0.32             | -       | 3                   | -20.1 $\pm$ 15.7             | 2                | -27.3 $\pm$ 5.9    | 0.637   |
| BS (PM-10)       | 2                   | 8.15 $\pm$ 11.9 <sup>b</sup> | 2                | -65.5 $\pm$ 9.5              | 0.038   | 3                   | -10.9 $\pm$ 3.52             | 2                | -36.0 $\pm$ 4.8    | 0.014   |
| BS (PM-2.5)      | 2                   | -9.44 $\pm$ 20.6             | 2                | -51.0 $\pm$ 13.4             | 0.093   | 3                   | -11.2 $\pm$ 5.82             | 2                | -42.71 $\pm$ 9.4   | 0.036   |
| VOC              | 2                   | -94.6 $\pm$ 4.56             | 2                | -99.4 $\pm$ 0.23             | 0.250   | 3                   | 26.7 $\pm$ 28.7 <sup>b</sup> | 2                | -34.2 $\pm$ 20.5   | 0.198   |
| Formaldehyde     | 2                   | -23.0 $\pm$ 30.7             | 2                | -12.1 $\pm$ 10.3             | 0.441   | 3                   | -14.7 $\pm$ 5.06             | 2                | -5.25 $\pm$ 0.14   | 0.194   |
| Nitrogen dioxide | 2                   | -24.1 $\pm$ 5.0              | 2                | 19.0 $\pm$ 19.0 <sup>b</sup> | 0.216   | 3                   | 46.4 $\pm$ 3.59 <sup>b</sup> | 1                | -75.6 <sup>a</sup> | -       |

2 <sup>a</sup> The result of one week or weekend was not available due to technical difficulties; <sup>b</sup> Negative values represent an increase in the IAQ parameter.

3

1 Table S7: Average  $\pm$  sd indoor/outdoor (I/O) ratios for non-intervention and intervention weekends and weeks.

| IAQ parameters  | Weekend              |                      |                             |            |                      | Week                 |                      |                             |               |                      |
|-----------------|----------------------|----------------------|-----------------------------|------------|----------------------|----------------------|----------------------|-----------------------------|---------------|----------------------|
|                 | No intervention      |                      | Intervention                |            |                      | No intervention      |                      | Intervention                |               |                      |
|                 | Classroom A<br>(N=3) | Classroom B<br>(N=3) | Both<br>classrooms<br>(N=2) | Change (%) | p-value <sup>a</sup> | Classroom A<br>(N=4) | Classroom B<br>(N=4) | Both<br>classrooms<br>(N=2) | Change<br>(%) | p-value <sup>a</sup> |
| PM-2.5 (spec)   | 0.44 $\pm$ 0.08      | 0.48 $\pm$ 0.06      | 0.13 $\pm$ 0.02             | -72        | 0.0003               | 1.2 $\pm$ 0.28       | 1.2 $\pm$ 0.38       | 0.48 $\pm$ 0.03             | -589          | 0.0009               |
| PM-2.5 (grav)   | 0.36 $\pm$ 0.04      | 0.41 $\pm$ 0.30      | 0.05 <sup>b</sup>           | -73        | -                    | 1.1 $\pm$ 0.33       | 1.1 $\pm$ 0.39       | 0.43 $\pm$ 0.06             | -61           | 0.0021               |
| PM-10 (spec)    | 0.38 $\pm$ 0.15      | 0.42 $\pm$ 0.14      | 0.11 $\pm$ 0.02             | -85        | 0.0061               | 3.9 $\pm$ 1.55       | 4.3 $\pm$ 1.6        | 1.62 $\pm$ 0.08             | -60           | 0.015                |
| PM-10 (grav)    | 0.30 $\pm$ 0.07      | 0.24 $\pm$ 0.18      | 0.06 $\pm$ 0.03             | -76        | 0.0218               | 2.9 $\pm$ 1.03       | 3.5 $\pm$ 1.4        | 1.49 $\pm$ 0.25             | -53           | 0.015                |
| VOC             | 0.07 $\pm$ 0.05      | 12 $\pm$ 9.4         | 0.09 $\pm$ 0.01             | -99        | 0.243                | 63 $\pm$ 74.5        | 26 $\pm$ 27          | 111.2 $\pm$ 58.7            | 151           | 0.445                |
| Formaldehyde    | 14 $\pm$ 0.95        | 20 $\pm$ 5.9         | 14 $\pm$ 0.36               | -15        | 0.351                | 25 $\pm$ 3.50        | 31 $\pm$ 10          | 23.4 $\pm$ 0.93             | -16           | 0.221                |
| NO <sub>2</sub> | 0.36 $\pm$ 0.06      | 0.35 $\pm$ 0.11      | 0.43 <sup>b</sup>           | 22         | -                    | 0.62 $\pm$ 0.13      | 0.35 $\pm$ 0.17      | 0.23 <sup>b</sup>           | -53           | -                    |

2 <sup>a</sup> Two-sided T-test on transformed data based comparison of average I/O ratios of both classrooms with and without interventions;

3 <sup>b</sup> Observation from classroom A was not available due to technical difficulties;

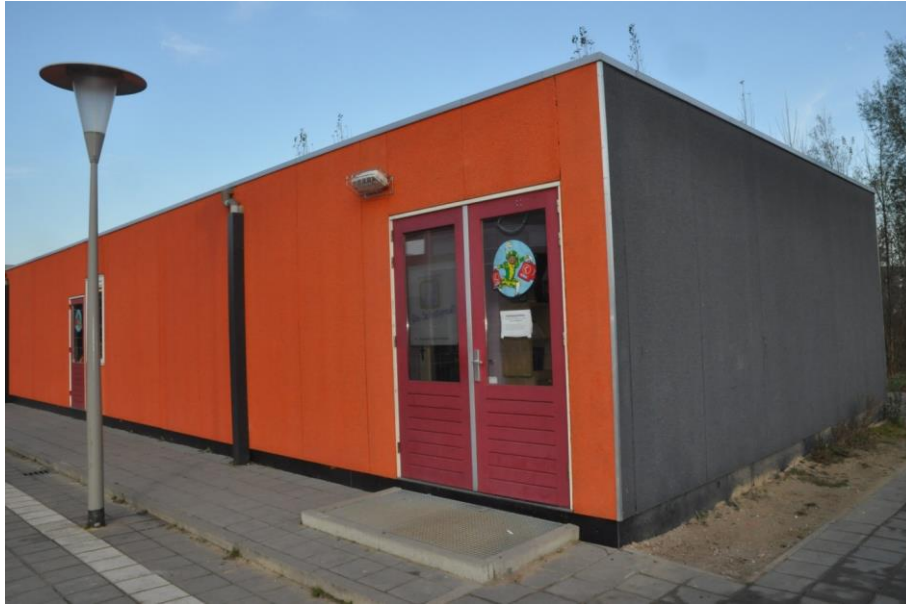

(a)

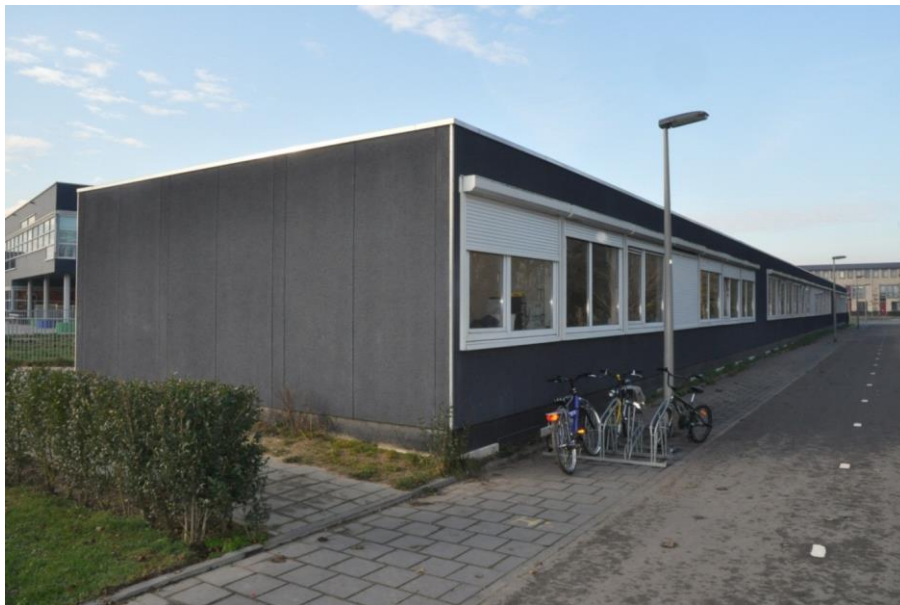

(b)

Figure S1: The main entrance of the semi-permanent unit with four classrooms (a) and the windows of the classrooms with the roller shutters (b)

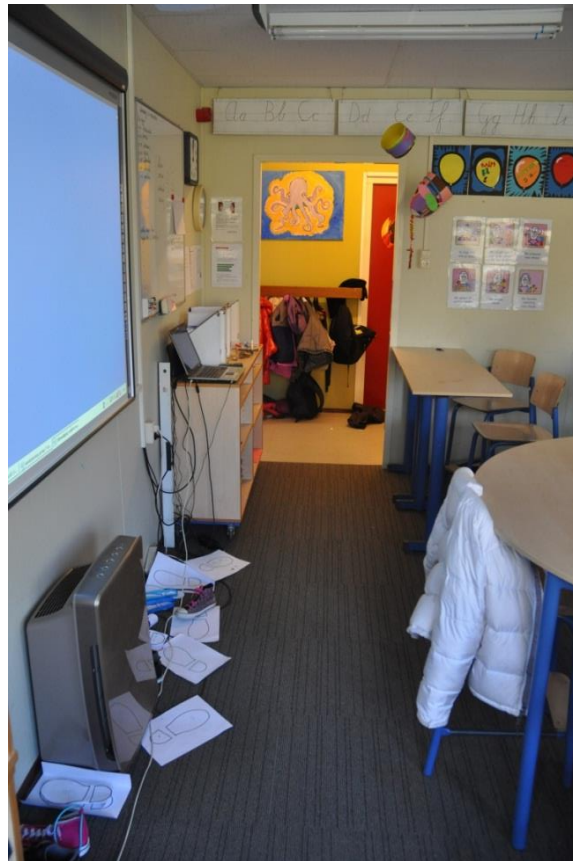

(a)

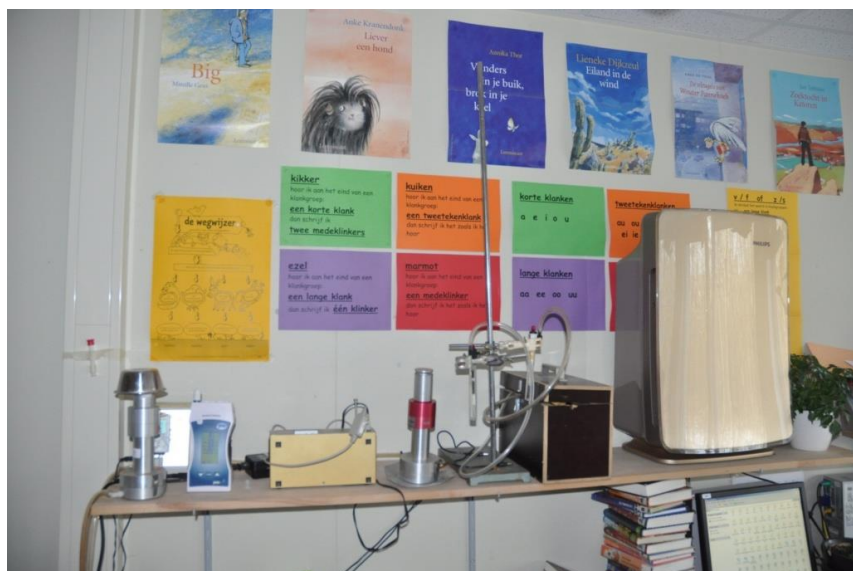

(b)

Figure S2: Front of the classroom with below the smart-board and the air filtration unit (a) and back of the classroom with the air filtration unit and the air sampling equipment on a bookshelf (b)

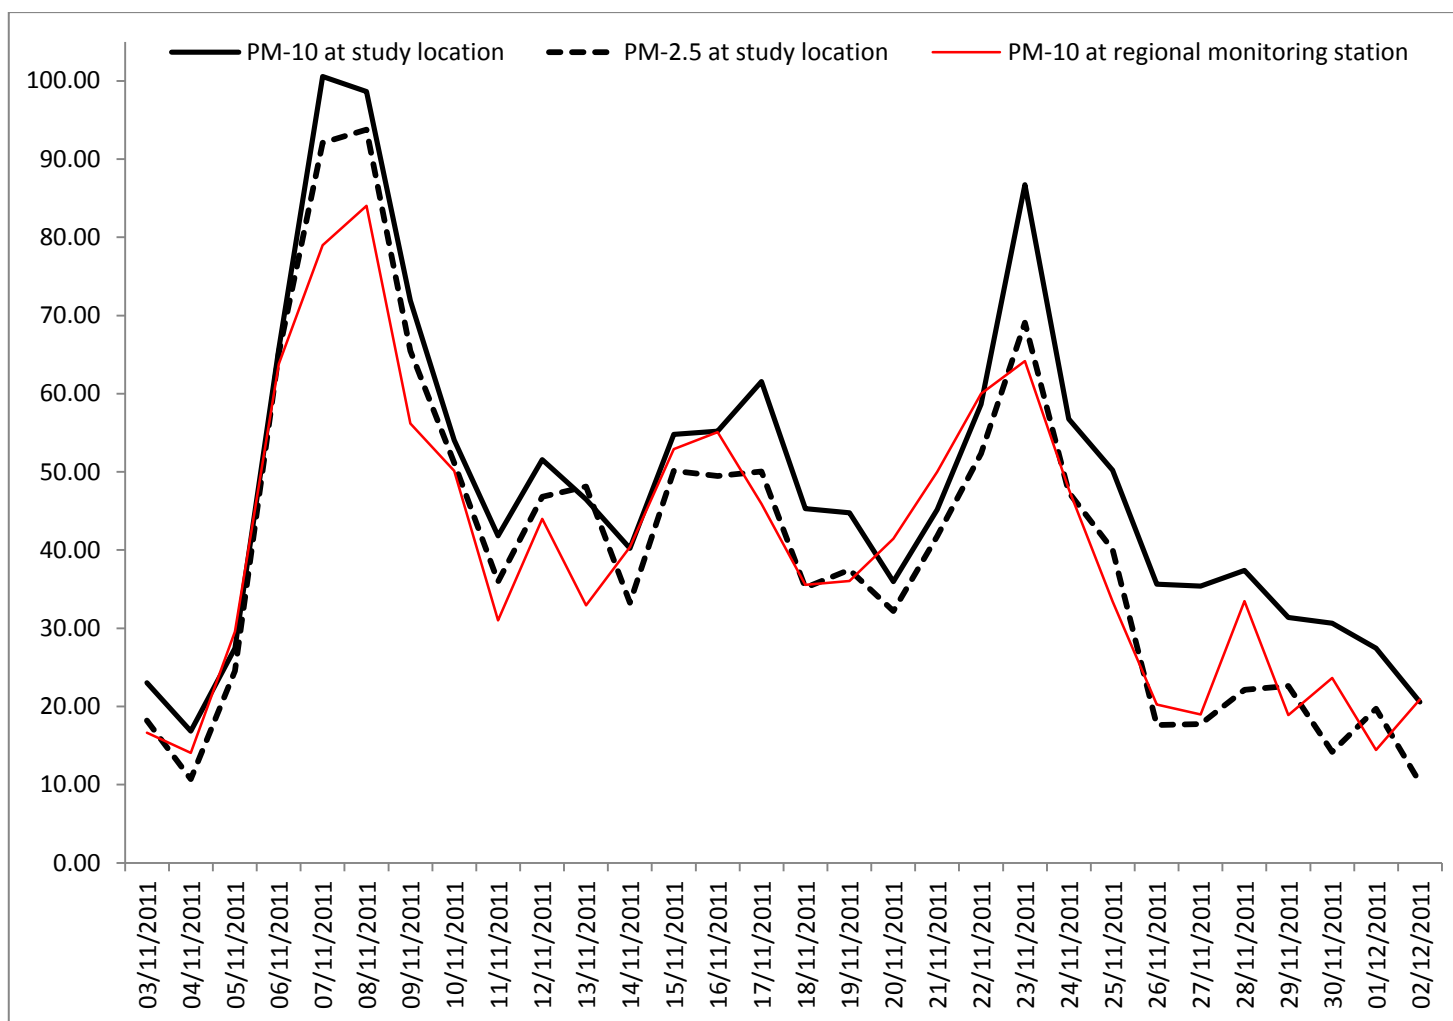

Figure S3: Day-average outdoor concentrations of PM-10 and PM-2.5 in  $\mu\text{g}/\text{m}^3$  at the school at a regional air monitoring station (30 km NW of the study location).
